# Supplementary material
Source: publisher figshare collection journal article supplement (https://gsajournals.figshare.com/articles/dataset/_/6591524)
Supplement: Supplementary file 1 [file 1]

## Sheet: Sheet1
Strain Name	Genotype
BS4228	prom-1(ok1140)/hT2 [bli-4(e937) let-?(q782) qIs48] (I;III); gld-3(q730)/mIn1 [mIs14 dpy-10(e128)] II.
BS4229	prom-1(ok1140) I/hT2 (I;III); gld-3(q730)/mIn1 [mIs14 dpy-10(e128)] II; glp-1(q175) III/hT2 [bli-4(e937) let-?(q782) qIs48] (I;III).
BS4227	gld-1(q485) skr-2(ok1938) I/hT2 (I;III); glp-1(q175) III/hT2 [bli-4(e937) let-?(q782) qIs48] (I;III).
BS4226	gld-1(q485) skr-2(ok1938) I/hT2 [bli-4(e937) let-?(q782) qIs48] (I;III).
BS4225	cye-1(eh10) gld-1(q485) I/hT2 [bli-4(e937) let-?(q782) qIs48] (I;III).
BS4224	fog-1(q785) gld-1(q485) I/hT2 (I;III); glp-1(q175) III/hT2 [bli-4(e937) let-?(q782) qIs48] (I;III).
BS4230	gld-2(q497) skr-2(q1938) I/hT2 [bli-4(e937) let-?(q782) qIs48] (I;III).
BS3795	gld-3(q730)/mIn1 [mIs14 dpy-10(e128)] II.
BS4222	gld-2(q497) I/hT2 [bli-4(e937) let-?(q782) qIs48] (I;III).
BS4232	gld-2(q497) skr-2(q1938) I/hT2 (I;III); glp-1(q175) III/hT2 [bli-4(e937) let-?(q782) qIs48] (I;III).
BS4235	skr-2(ok1938) I/hT2 [bli-4(e937) let-?(q782) qIs48] (I;III); gld-3(q730)/mIn1 [mIs14 dpy-10(e128)] II.
BS4236	skr-2(ok1938) I/hT2 (I;III); gld-3(q730)/mIn1 [mIs14 dpy-10(e128)] II; glp-1(q175) III/hT2 [bli-4(e937) let-?(q782) qIs48] (I;III).
BS4240	gld-2(q497) I/hT2 [bli-4(e937) let-?(q782) qIs48] (I;III).; nos-3(oz231)/mIn1 [mIs14 dpy-10(e128)] II.
BS4239	gld-2(q497) prom-1(ok1140) I/hT2 [bli-4(e937) let-?(q782) qIs48] (I;III); nos-3(oz231)/mIn1 [mIs14 dpy-10(e128)] II.
BS4153	gld-1(q485) I/hT2 [bli-4(e937) let-?(q782) qIs48] (I;III).
BS4241	cye-1(eh10) gld-1(q485) prom-1(ok1140) I/hT2 [bli-4(e937) let-?(q782) qIs48] (I;III).
AMJ345	jamSi2[mex-5p::rde-1+ + unc-119(+)] II; rde-1(ne219) V.
VC1439	skr-2(ok1938) I/hT2 [bli-4(e937) let-?(q782) qIs48] (I;III).
BS4251	gld-1(q485) skr-2(ok1938) I/hT2 (I;III); glp-1(q175) III/hT2 [bli-4(e937) let-?(q782) qIs48] (I;III); jamSi2[mex-5p::rde-1+ + unc-119(+)] II; rde-1(ne219) V.
BS4253	gld-2(q497) I/hT2 (I;III); glp-1(q175) III/hT2 [bli-4(e937) let-?(q782) qIs48] (I;III).
RB1692	cki-2(ok2105)
BS4099	gld-1(q361) prom-1(ok1140) I/hT2 [bli-4(e937) let-?(q782) qIs48] (I;III).
BS4258	prom-1(ok1140) I/hT2 [bli-4(e937) let-?(q782) qIs48] (I;III); cki-2(ok2105)II.
BS4260	prom-1(ok1140) I/hT2 (I;III); glp-1(ar202) III/hT2 [bli-4(e937) let-?(q782) qIs48] (I;III).
BS4257	gld-1(q485) prom-1(ok1140) I/hT2 [bli-4(e937) let-?(q782) qIs48] (I;III).
BS4266	gld-1(q485) I/hT2 (I;III); glp-1(q175) III/hT2 [bli-4(e937) let-?(q782) qIs48] (I;III).
BS4263	gld-2(q497) prom-1(ok1140) I/hT2 [bli-4(e937) let-?(q782) qIs48] (I;III).
CA1207	dhc-1(ie28[dhc-1::degron::GFP]).
BS4264	gld-1(q485) prom-1(ok1140) I/hT2 (I;III); glp-1(q175) III/hT2 [bli-4(e937) let-?(q782) qIs48] (I;III).
BS4265	gld-2(q497) prom-1(ok1140) I/hT2 (I;III); glp-1(q175) III/hT2 [bli-4(e937) let-?(q782) qIs48] (I;III).
BS4277	dhc-1(ie28[dhc-1::degron::GFP]) prom-1(ok1140) I/hT2 [bli-4(e937) let-?(q782) qIs48] (I;III).
BS4145	gld-2(q497) gld-1(q485) I/hT2 [bli-4(e937) let-?(q782) qIs48] (I;III).
BS5272	nos-3(oz231) II.
BS4313	prom-1(ok1140) I/hT2 [bli-4(e937) let-?(q782) qIs48] (I;III).
WS3455	chk-2(gk212) V.
BS4165	fog-1(q785) prom-1(ok1140) I/hT2 [bli-4(e937) let-?(q782) qIs48] (I;III).
BS4292	gld-1(q485) I/hT2 [bli-4(e937) let-?(q782) qIs48] (I;III).; chk-2(gk212)/ oxTi906 V.
BS4298	gld-2(q497) gld-1 (q485) prom-1(ok1140) I/hT2 [bli-4(e937) let-?(q782) qIs48] (I;III).
BS4300	gld-4(ef15) I/hT2 [bli-4(e937) let-?(q782) qIs48] (I;III).
BS4301	gld-4(ef15) prom-1(ok1140) I/hT2 [bli-4(e937) let-?(q782) qIs48] (I;III).
UV150	prom-1(ok1140) unc-55(e402)/hT2 [dpy-18(h662)] I; +/hT2 [bli-4(e937)] III.
UV151	prom-1(ok1140) unc-55(e402)/hT2 [dpy-18(h662)] I; +/hT2 [bli-4(e937)] III ; wapl-1(tm814) IV.
VC1241	skr-1(ok1696) I.
BS4101	gld-1(q361)/ unc-13(e51) ccIs4251 I.
BS4051	him-19(tm3538) I.
RB1583	plk-2(ok1936) I.
BS4314	prom-1(ok1140) I/hT2 [bli-4(e937) let-?(q782) qIs48] (I;III); nos-3(oz231)/mIn1 [mIs14 dpy-10(e128)] II.
BS4202	mek-2(q425) gld-1(q485) I/hT2 [bli-4(e937) let-?(q782) qIs48] (I;III).
BS4203	mek-2(q425) gld-1(q485) prom-1(ok1140) I/hT2 [bli-4(e937) let-?(q782) qIs48] (I;III).
BS4315	gld-1(q485) I/hT2 [bli-4(e937) let-?(q782) qIs48] (I;III).; fem-3(q20) IV.
BS4316	gld-1(q485) prom-1(ok1140) I/hT2 [bli-4(e937) let-?(q782) qIs48] (I;III).; fem-3(q20) IV.
